# Supplementary material for: Novel valley character and tunable quasi-half-valley metal state in Janus monolayer VSiGeP4
Source: Royal Society of Chemistry journal article supplement (doi:10.1039/d3cp05636h), 2024-01-01
Supplement: d3cp05636h1.pdf [file d3cp05636h1.pdf]

# Supplemental Materials for “Novel valley character and tunable quasi-half-valley metal state in Janus monolayer VSiGeP<sub>4</sub>”

Kang Jia<sup>1</sup>, Xiao-Jing Dong<sup>1</sup>, Sheng-Shi Li<sup>2</sup>, Wei-Xiao Ji<sup>2</sup>, and Chang-Wen Zhang<sup>1,2\*</sup>

1. School of Physics and Physical Engineering, Qufu Normal University, Qufu, Shandong, 273100, PRC

2. School of Physics and Technology, Institute of Spintronics, University of Jinan, Jinan, Shandong, 250022, PRC

\*Corresponding author: [ss\\_zhangchw@ujn.edu.cn](mailto:ss_zhangchw@ujn.edu.cn)

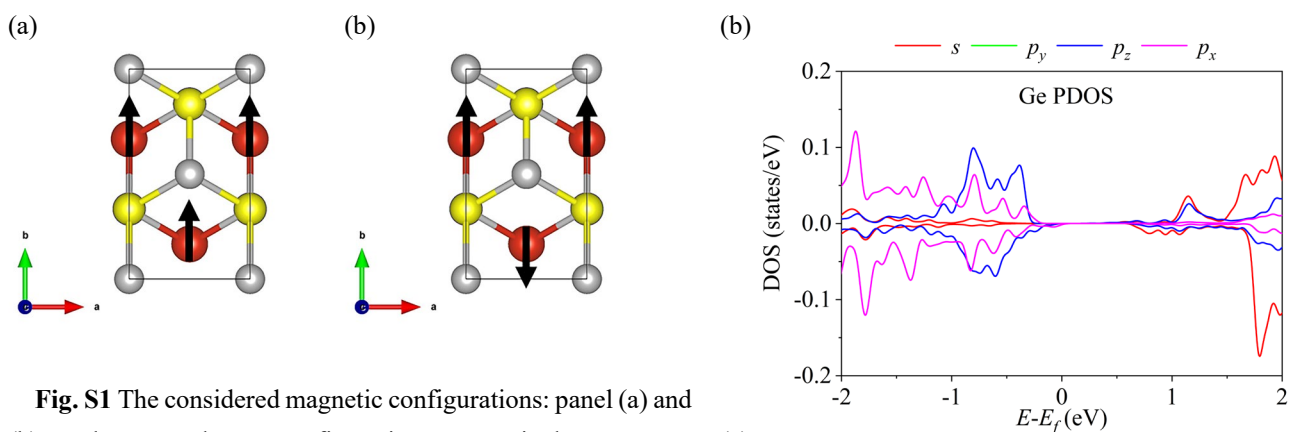

**Fig. S1** The considered magnetic configurations: panel (a) and (b) are the FM and AFM configurations, respectively.

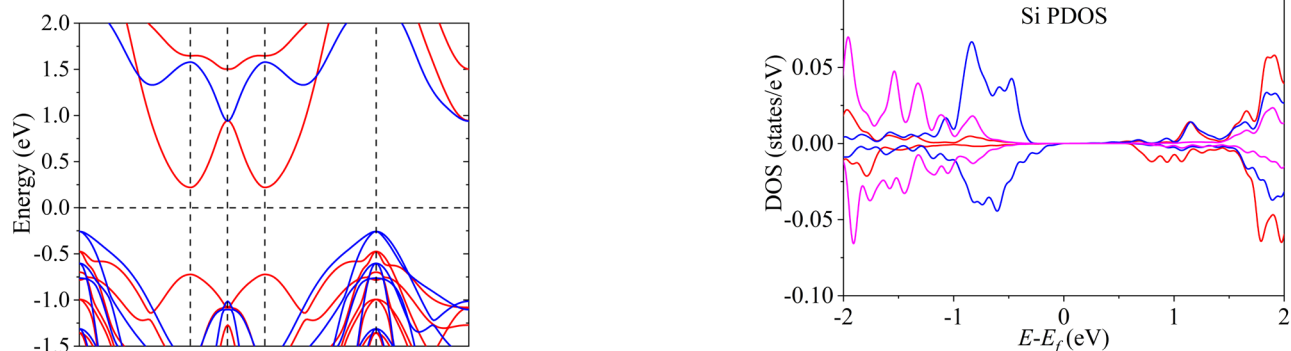

**Fig. S2** The band structure at the HSE06 level for ML VSiGeP<sub>4</sub> without the involvement of the SOC effect.

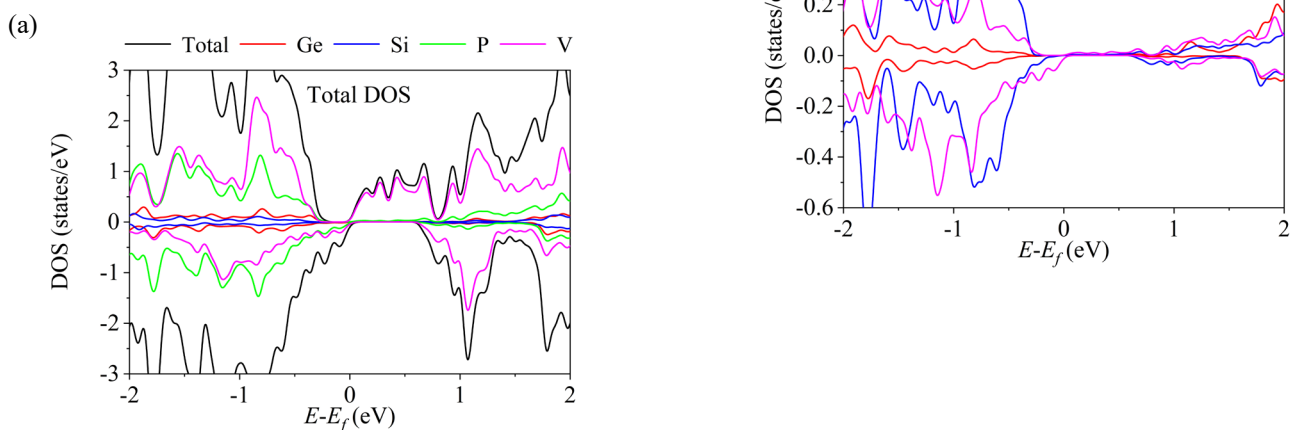

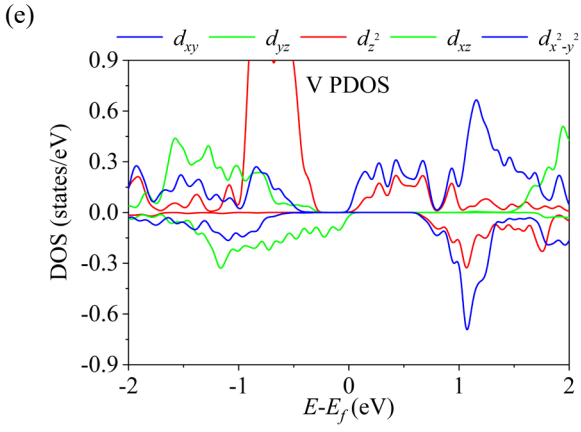

**Fig. S3** (a) The total density of states (DOS) of the ML VSiGeP<sub>4</sub>. (b) The partial density of states (PDOS) of Ge atoms. (c) The PDOS of Si atoms. (d) The PDOS of P atoms. (e) The PDOS of V atoms.

We calculate the total and partial density of states (DOS) of the ML VSiGeP<sub>4</sub>. As drawn in Fig. S2, the CBM primarily consists of  $d_{x^2-y^2}/d_{xy}$  orbitals of V, and the VBM is mainly composed of  $d_{xz}+d_{yz}$  orbitals of V and minority  $p_x$  orbital of P, which is in agreement with the orbital-resolved band structure (see Fig. 3(d)).

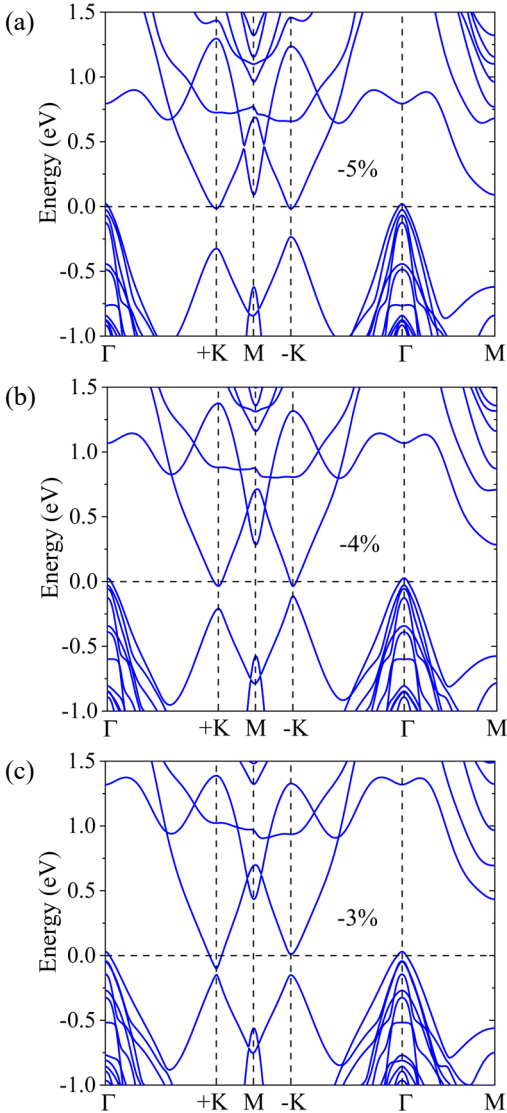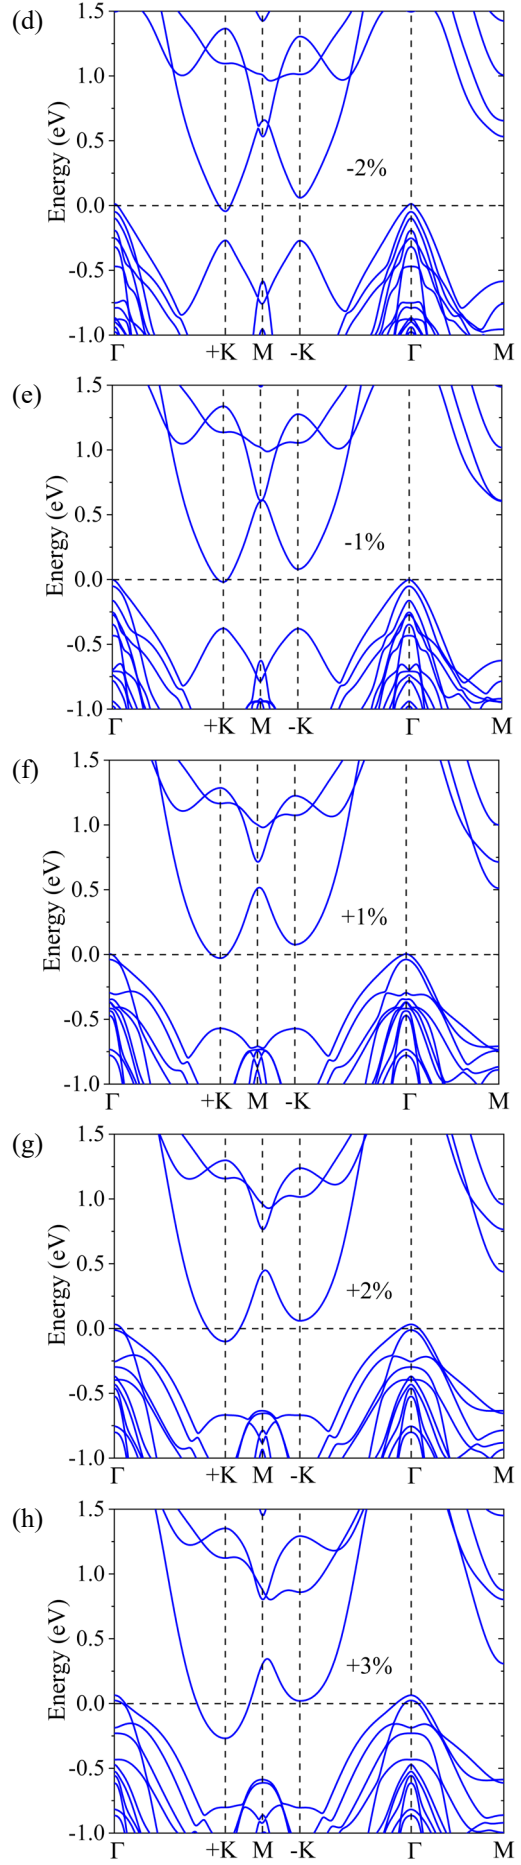

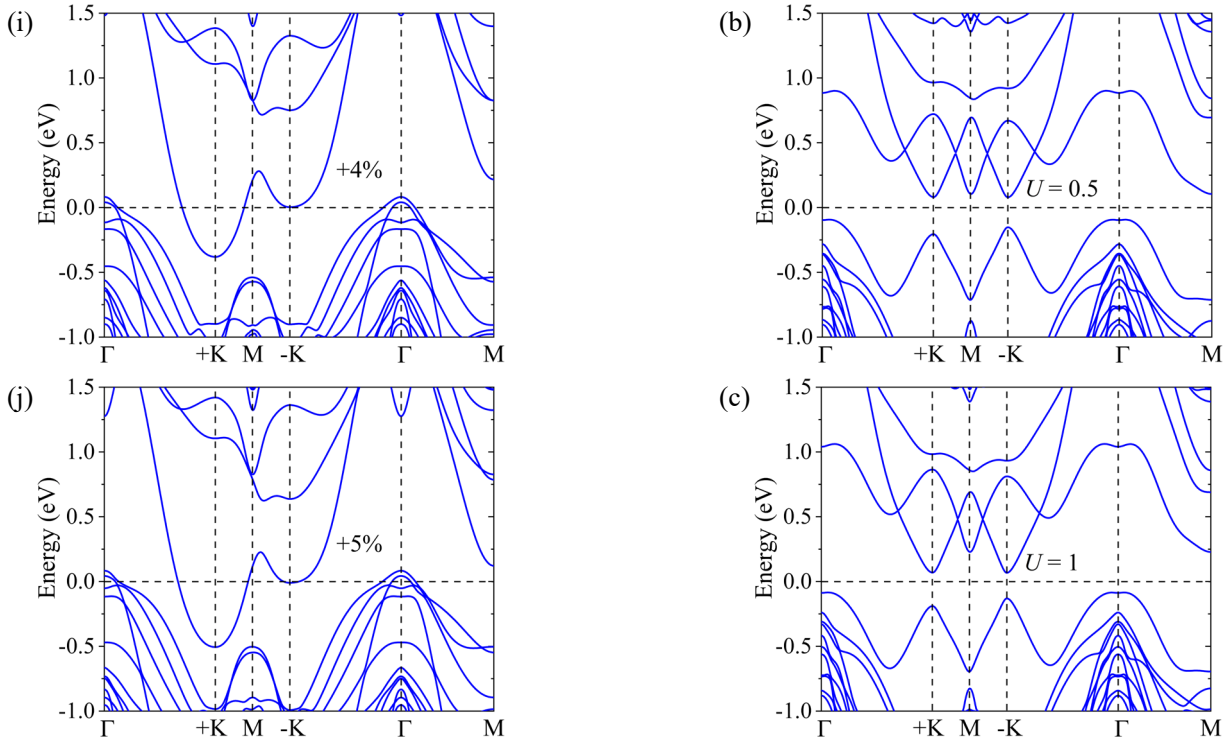

**Fig. S4** The energy band structures of ML VSiGeP<sub>4</sub> by using GGA+SOC with OOP magnetization at different strains ( $-5% < \varepsilon < +5%$ ).

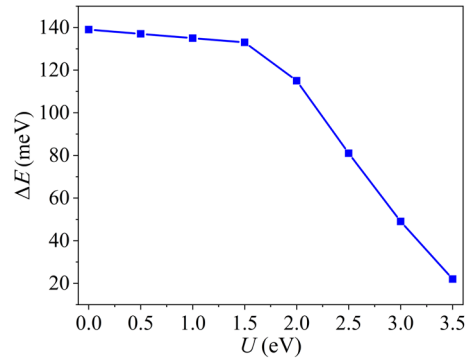

**Fig. S5** The energy differences  $\Delta E$  ( $\Delta E = E_{\text{AFM}} - E_{\text{FM}}$ ) between AFM and FM states as function of  $U$  value.

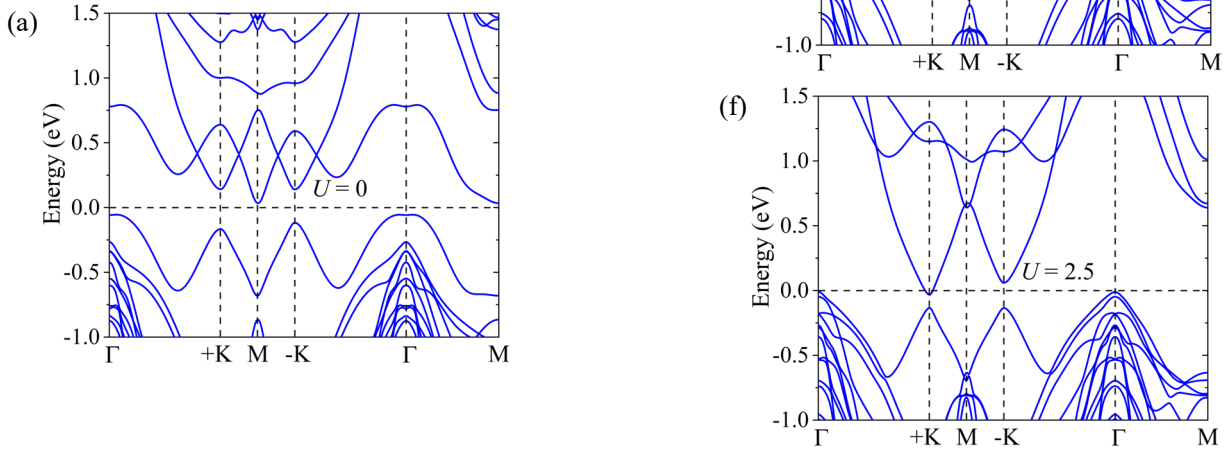

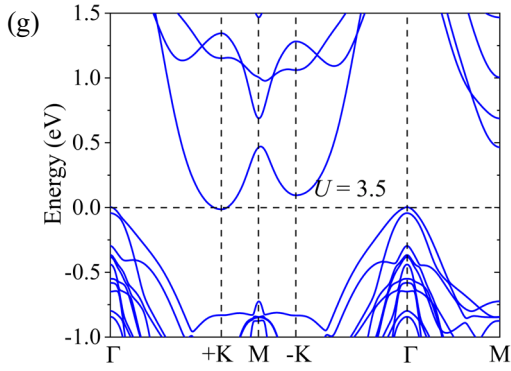

**Fig. S6** The energy band structures of ML VSiGeP<sub>4</sub> by using GGA+SOC with OOP magnetization at different  $U$  values ( $0 \text{ eV} < U < 3.5 \text{ eV}$ ).

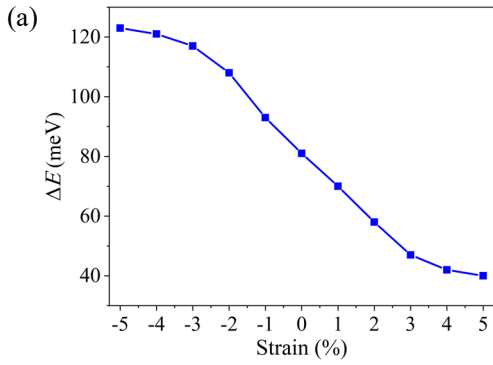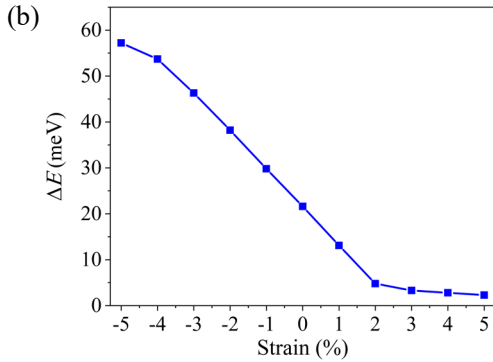

**Fig. S7** For (a)  $U = 2.5 \text{ eV}$  and (b)  $U = 3.5 \text{ eV}$ , the energy differences  $\Delta E$  ( $\Delta E = E_{\text{AFM}} - E_{\text{FM}}$ ) between AFM and FM states as a function of strain.

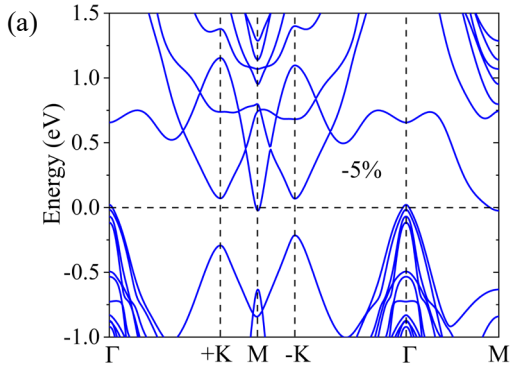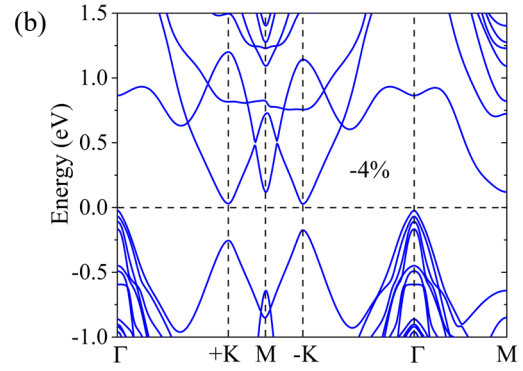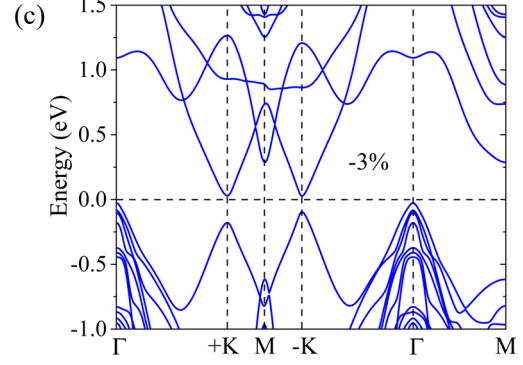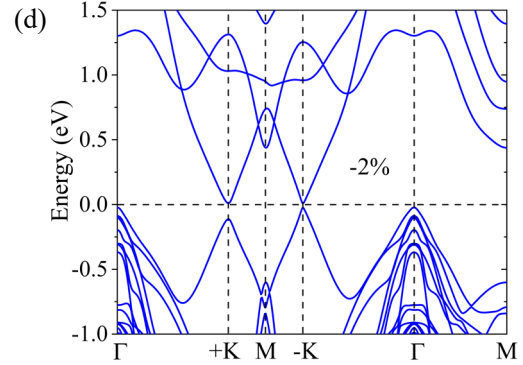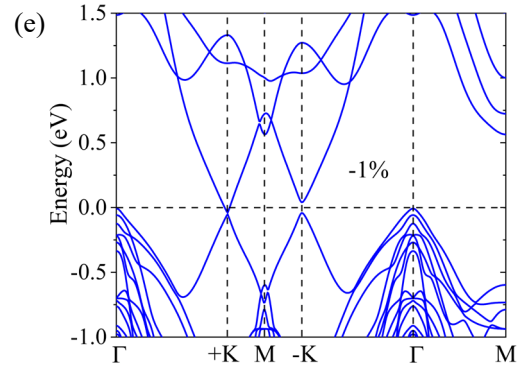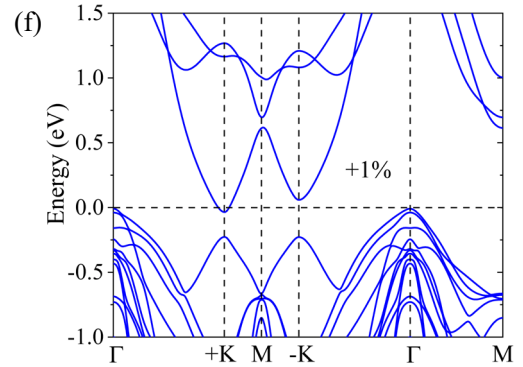

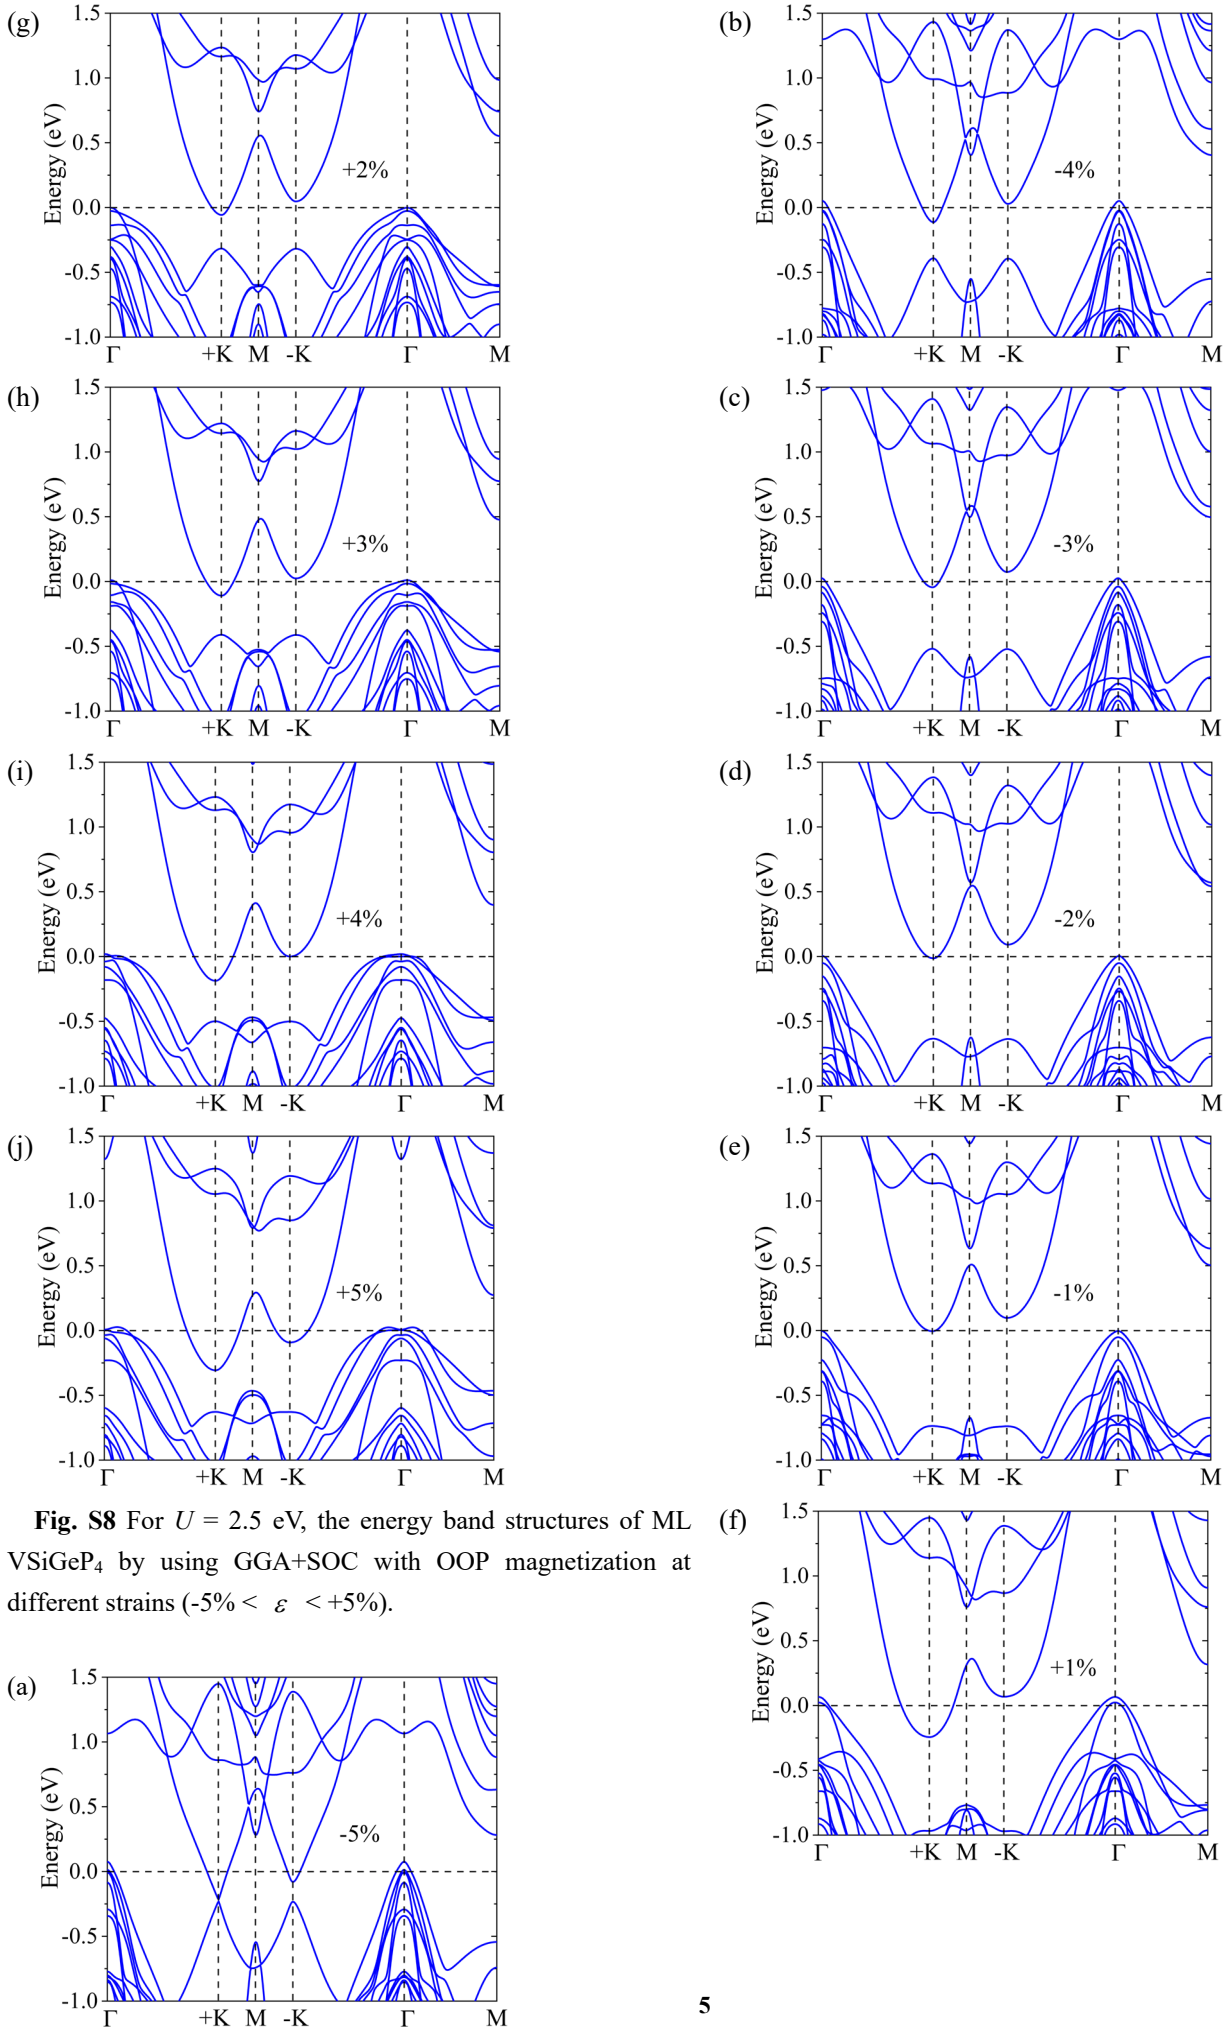

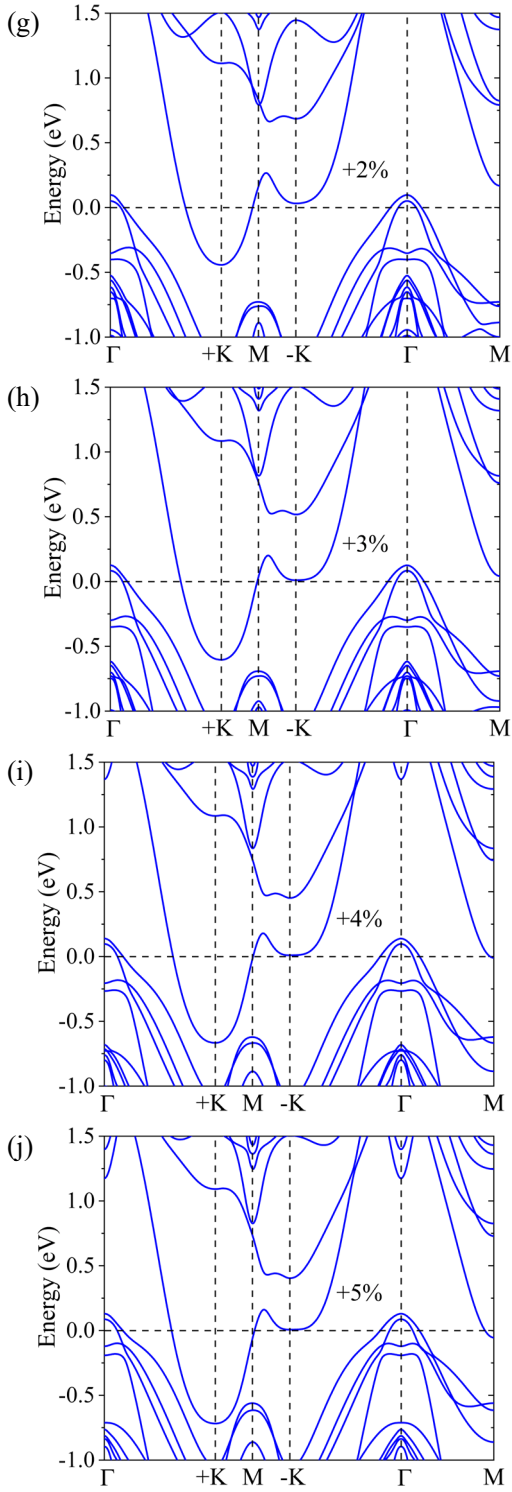

**Fig. S9** For  $U = 3.5$  eV, the energy band structures of ML VSiGeP<sub>4</sub> by using GGA+SOC with OOP magnetization at different strains ( $-5\% < \varepsilon < +5\%$ ).

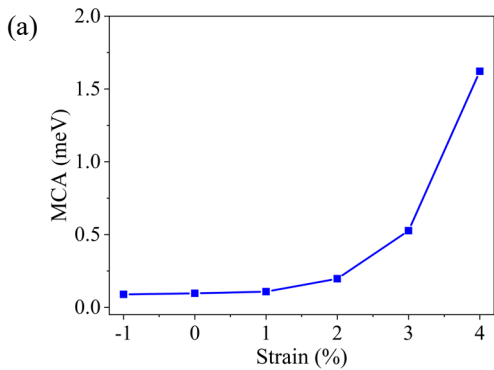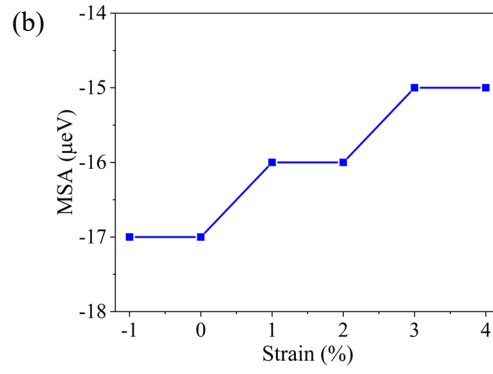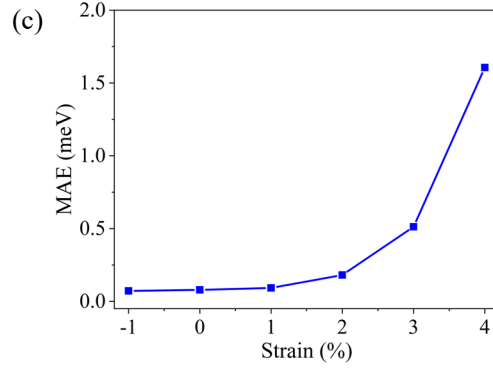

**Fig. S10** For  $U = 2.5$  eV, the MCA energy, MSA energy, and MAE as a function of strain.

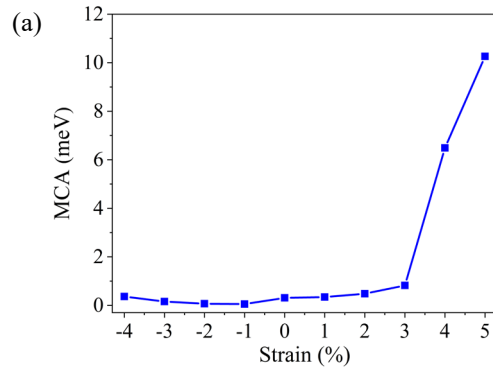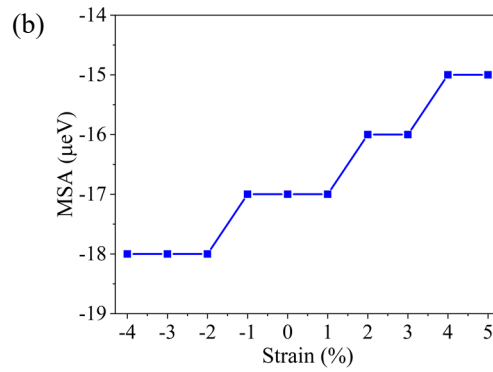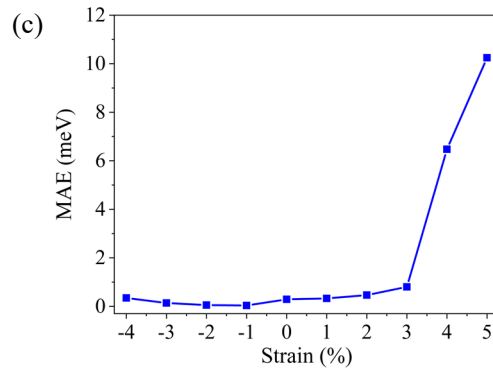

**Fig. S11** For  $U = 3.5$  eV, the MCA energy, MSA energy, and MAE as a function of strain.

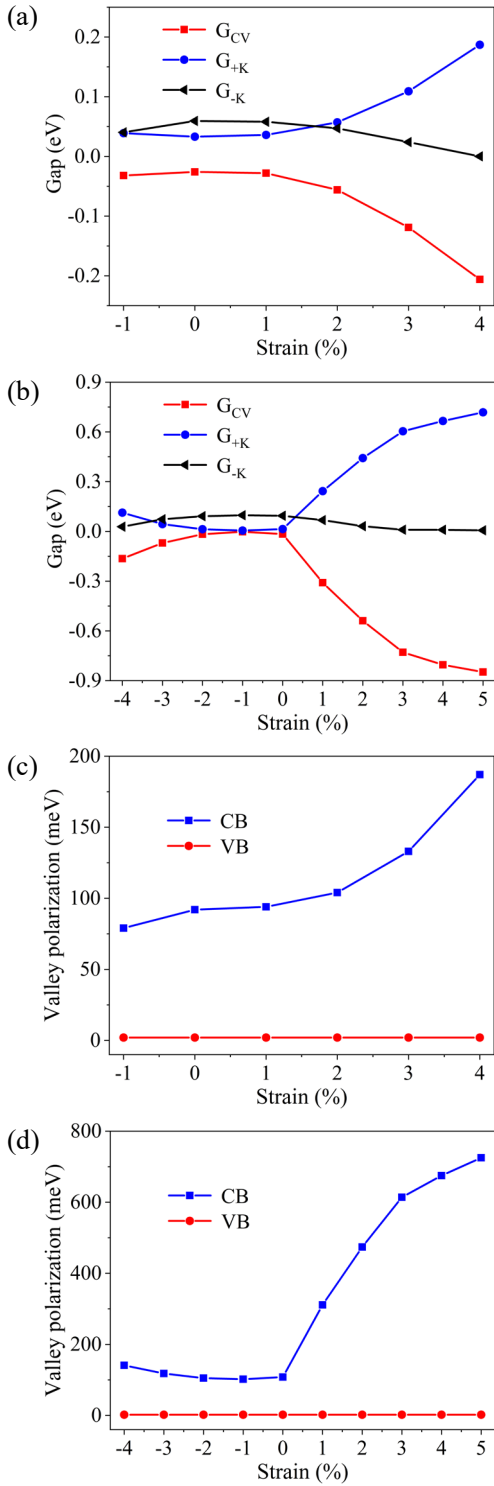

**Fig. S12** For ML VSiGeP<sub>4</sub>, the relevant band gap of (a)  $U = 2.5$  eV and (b)  $U = 3.5$  eV and the VP of (c)  $U = 2.5$  eV and (d)  $U = 3.5$  eV for CB and VB as a function of strain.
